# Supplementary material
Source: Springer Nature journal article supplement (https://www.springermedizin.de/resource/supplementary/12936_2008_651_MOESM2_ESM.pdf/9547918)
Supplement: MOESM2 [file 9547918]

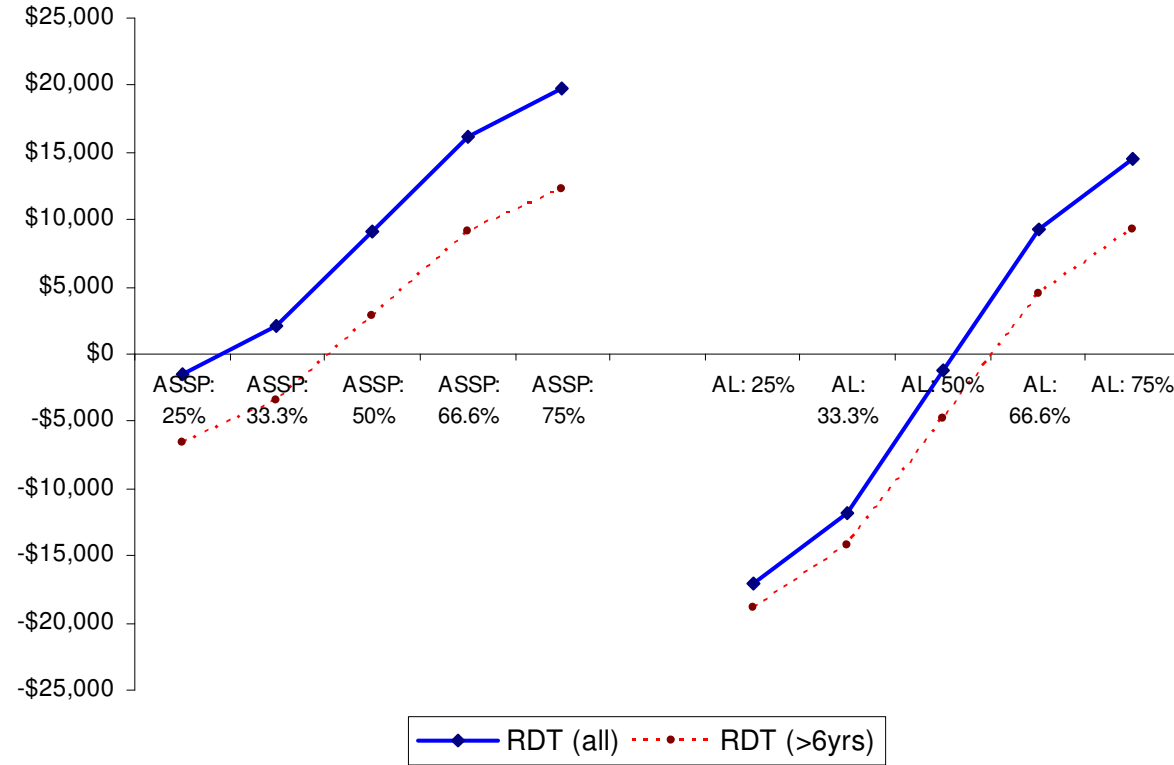

Note: The positive figures are incremental (additional) costs, while the negative figures are cost savings.
